# Supplementary material for: Spectroscopy of the formaldehyde isotopomer H213CO in the microwave to terahertz region
Source: Royal Society of Chemistry journal article supplement (doi:10.1039/b002819n), 2000-01-01
Supplement: 13suppl.pdf [file 13suppl.pdf]

**Supplementary Table** Assignments,<sup>a</sup> frequencies (MHz), uncertainties (kHz), source,<sup>b</sup> and residuals o-c (kHz) with respect to the *S* and *A* reduced Hamiltonians of transitions of H<sub>2</sub><sup>13</sup>CO.

| Transition                              | frequency   | unc. | s. | o-c( <i>S</i> ) | o-c( <i>A</i> ) |
|-----------------------------------------|-------------|------|----|-----------------|-----------------|
| 3 <sub>3,0</sub> - 3 <sub>3,1</sub>     | 0.5590      | 0.5  | 6  | 1.3             | 1.3             |
| 4 <sub>3,1</sub> - 4 <sub>3,2</sub>     | 3.9035      | 0.3  | 6  | 0.3             | 0.3             |
| 5 <sub>3,2</sub> - 5 <sub>3,3</sub>     | 15.6075     | 0.5  | 6  | 0.2             | 0.2             |
| 6 <sub>3,3</sub> - 6 <sub>3,4</sub>     | 46.7965     | 0.5  | 6  | -0.0            | -0.0            |
| 1 <sub>1,0</sub> - 1 <sub>1,1</sub>     | 4593.08854  | 0.06 | 6  | -0.06           | -0.06           |
| 7 <sub>2,5</sub> - 7 <sub>2,6</sub>     | 8012.1751   | 0.2  | K  | -0.1            | -0.1            |
| 32 <sub>5,27</sub> - 32 <sub>5,28</sub> | 8205.9687   | 4.0  | K  | 5.0             | 5.1             |
| 24 <sub>3,21</sub> - 25 <sub>1,24</sub> | 8458.425    | 10.  | 6  | -9.             | -8.             |
| 15 <sub>3,12</sub> - 15 <sub>3,13</sub> | 10063.2000  | 2.8  | K  | -1.3            | -1.1            |
| 33 <sub>5,28</sub> - 33 <sub>5,29</sub> | 11007.7661  | 0.3  | K  | 0.2             | 0.3             |
| 24 <sub>4,20</sub> - 24 <sub>4,21</sub> | 11691.8768  | 0.2  | K  | 0.1             | 0.1             |
| 8 <sub>2,6</sub> - 8 <sub>2,7</sub>     | 13287.3240  | 0.2  | K  | -0.1            | -0.1            |
| 2 <sub>1,1</sub> - 2 <sub>1,2</sub>     | 13778.80413 | 0.15 | 6  | 0.02            | 0.02            |
| 33 <sub>2,31</sub> - 32 <sub>4,28</sub> | 14519.0053  | 8.0  | K  | 2.4             | 2.8             |
| 16 <sub>3,13</sub> - 16 <sub>3,14</sub> | 14592.4143  | 0.5  | K  | -1.4            | -1.2            |
| 34 <sub>5,29</sub> - 34 <sub>5,30</sub> | 14615.5631  | 2.8  | K  | 0.9             | 0.9             |
| 42 <sub>3,39</sub> - 41 <sub>5,36</sub> | 15255.5194  | 5.1  | K  | -0.1            | -0.1            |
| 25 <sub>4,21</sub> - 25 <sub>4,22</sub> | 15973.4718  | 0.7  | K  | 0.6             | 0.6             |
| 35 <sub>5,30</sub> - 35 <sub>5,31</sub> | 19216.1019  | 0.2  | K  | -0.2            | -0.2            |
| 45 <sub>6,39</sub> - 45 <sub>6,40</sub> | 20218.4408  | 6.7  | K  | 0.4             | 3.4             |
| 17 <sub>3,14</sub> - 17 <sub>3,15</sub> | 20649.2351  | 0.4  | K  | 0.6             | 0.9             |
| 9 <sub>2,7</sub> - 9 <sub>2,8</sub>     | 20736.2512  | 3.0  | K  | 3.7             | 3.6             |
| 26 <sub>1,25</sub> - 25 <sub>3,22</sub> | 20938.172   | 10.  | 6  | 1.              | 0.              |
| 26 <sub>4,22</sub> - 26 <sub>4,23</sub> | 21518.4606  | 0.2  | K  | -0.1            | -0.1            |
| 31 <sub>1,30</sub> - 30 <sub>3,27</sub> | 23637.145   | 10.  | 6  | -29.            | -30.            |
| 36 <sub>5,31</sub> - 36 <sub>5,32</sub> | 25027.1086  | 0.2  | K  | 0.1             | 0.1             |
| 46 <sub>6,40</sub> - 46 <sub>6,41</sub> | 25817.8143  | 12.7 | K  | -1.0            | -5.3            |
| 3 <sub>1,2</sub> - 3 <sub>1,3</sub>     | 27555.673   | 10.  | 6  | 8.              | 8.              |
| 18 <sub>3,15</sub> - 18 <sub>3,16</sub> | 28582.350   | 10.  | 6  | -4.             | -3.             |
| 27 <sub>4,23</sub> - 27 <sub>4,24</sub> | 28606.523   | 10.  | 6  | 3.              | 3.              |
| 10 <sub>2,8</sub> - 10 <sub>2,9</sub>   | 30819.202   | 10.  | 6  | 2.              | 2.              |
| 37 <sub>5,32</sub> - 37 <sub>5,33</sub> | 32299.148   | 10.  | 6  | -1.             | -1.             |
| 28 <sub>4,24</sub> - 28 <sub>4,25</sub> | 37553.751   | 10.  | 6  | 0.              | 1.              |
| 19 <sub>3,16</sub> - 19 <sub>3,17</sub> | 38774.709   | 10.  | 6  | -1.             | -1.             |

|                         |             |      |    |       |      |
|-------------------------|-------------|------|----|-------|------|
| $32_{3,29} - 33_{1,32}$ | 40848.916   | 20.  | 6  | -77.  | -85. |
| $27_{1,26} - 26_{3,23}$ | 40854.804   | 20.  | 6  | -7.   | -9.  |
| $38_{5,33} - 38_{5,34}$ | 41316.628   | 20.  | 6  | 11.   | 10.  |
| $11_{2,9} - 11_{2,10}$  | 43992.640   | 20.  | 6  | -17.  | -18. |
| $4_{1,3} - 4_{1,4}$     | 45920.064   | 10.  | 14 | 6.    | 6.   |
| $29_{4,25} - 29_{4,26}$ | 48710.574   | 20.  | 6  | 38.   | 39.  |
| $28_{1,27} - 27_{3,24}$ | 51077.029   | 20.  | 6  | -22.  | -24. |
| $29_{1,28} - 28_{3,25}$ | 51541.860   | 20.  | 6  | -11.  | -14. |
| $20_{3,17} - 20_{3,18}$ | 51635.034   | 20.  | 6  | 32.   | 32.  |
| $39_{5,34} - 39_{5,35}$ | 52397.434   | 20.  | 6  | -21.  | -23. |
| $21_{3,18} - 21_{3,19}$ | 67585.830   | 40.  | 6  | -13.  | -12. |
| $5_{1,4} - 5_{1,5}$     | 68864.551   | 28.  | 14 | -13.  | -13. |
| $1_{0,1} - 0_{0,0}$     | 71024.788   | 10.  | 6  | 8.    | 7.   |
| $33_{4,29} - 33_{4,30}$ | 123310.3368 | 12.0 | C  | -10.3 | -4.2 |
| $16_{2,14} - 17_{0,17}$ | 126629.3013 | 10.0 | C  | -4.7  | -6.2 |
| $7_{1,6} - 7_{1,7}$     | 128431.4301 | 4.0  | C  | 9.9   | 9.7  |
| $17_{2,15} - 18_{0,18}$ | 130311.4174 | 10.0 | C  | -0.3  | -1.4 |
| $15_{2,13} - 16_{0,16}$ | 131337.3207 | 8.0  | C  | 5.5   | 3.9  |
| $15_{2,13} - 15_{2,14}$ | 135465.1712 | 5.0  | C  | -0.1  | -1.1 |
| $2_{1,2} - 1_{1,1}$     | 137449.9503 | 4.0  | C  | -3.3  | -3.6 |
| $24_{3,21} - 24_{3,22}$ | 138093.5908 | 8.0  | C  | -0.5  | 0.7  |
| $2_{0,2} - 1_{0,1}$     | 141983.7404 | 4.0  | C  | -6.2  | -6.5 |
| $18_{2,16} - 19_{0,19}$ | 142299.0907 | 10.0 | C  | -4.5  | -4.7 |
| $14_{2,12} - 15_{0,15}$ | 144399.9431 | 10.0 | C  | 5.4   | 3.9  |
| $2_{1,1} - 1_{1,0}$     | 146635.6717 | 4.0  | C  | 2.6   | 2.3  |
| $21_{3,18} - 22_{1,21}$ | 149145.9718 | 7.0  | C  | -4.1  | -4.3 |
| $34_{4,30} - 34_{4,31}$ | 151500.6034 | 15.0 | C  | -5.0  | 3.8  |
| $19_{2,17} - 20_{0,20}$ | 162408.0050 | 15.0 | C  | -8.3  | -7.3 |
| $8_{1,7} - 8_{1,8}$     | 164997.3691 | 5.0  | C  | 6.4   | 6.1  |
| $13_{2,11} - 14_{0,14}$ | 165644.2228 | 10.0 | C  | -1.4  | -2.7 |
| $16_{2,14} - 16_{2,15}$ | 169466.3174 | 5.0  | C  | 2.8   | 1.4  |
| $25_{3,22} - 25_{3,23}$ | 170362.7203 | 7.0  | C  | -6.6  | -4.9 |
| $9_{1,8} - 9_{1,9}$     | 206023.667  | 10.  | 6  | 18.   | 17.  |
| $3_{1,3} - 2_{1,2}$     | 206131.626  | 10.  | 6  | 7.    | 7.   |
| $3_{0,3} - 2_{0,2}$     | 212811.184  | 10.  | 6  | -6.   | -6.  |
| $3_{2,2} - 2_{2,1}$     | 213037.340  | 85.  | 6  | 60.   | 60.  |
| $3_{2,1} - 2_{2,0}$     | 213293.565  | 85.  | 6  | 1.    | 0.   |
| $3_{1,2} - 2_{1,1}$     | 219908.525  | 56.  | 6  | 45.   | 44.  |
| $4_{1,4} - 3_{1,3}$     | 274762.112  | 10.  | 6  | 10.   | 9.   |
| $4_{0,4} - 3_{0,3}$     | 283441.876  | 10.  | 6  | 9.    | 8.   |

---

|                         |            |      |     |       |       |
|-------------------------|------------|------|-----|-------|-------|
| $4_{2,3} - 3_{2,2}$     | 283992.510 | 160. | 6   | 43.   | 42.   |
| $4_{3,2} - 3_{3,1}$     | 284117.450 | 160. | 6   | 150.  | 149.  |
| $4_{3,1} - 3_{3,0}$     | 284120.620 | 160. | 6   | -25.  | -27.  |
| $4_{2,2} - 3_{2,1}$     | 284632.420 | 160. | 6   | -130. | -131. |
| $4_{1,3} - 3_{1,2}$     | 293126.515 | 46.  | 14  | 20.   | 20.   |
| $5_{1,5} - 4_{1,4}$     | 343325.713 | 30.  | 6   | 59.   | 59.   |
| $29_{3,26} - 29_{3,27}$ | 349480.112 | 50.  | L   | -19.  | -13.  |
| $20_{2,18} - 20_{2,19}$ | 353304.496 | 50.  | L   | -42.  | -44.  |
| $5_{0,5} - 4_{0,4}$     | 353811.872 | 25.  | 6,L | 9.    | 8.    |
| $18_{3,15} - 19_{1,18}$ | 354393.869 | 50.  | L   | -15.  | -15.  |
| $5_{2,4} - 4_{2,3}$     | 354898.595 | 50.  | L   | -28.  | -29.  |
| $5_4 - 4_4$             | 355028.955 | 50.  | L   | -17.  | -18.  |
| $12_{1,11} - 12_{1,12}$ | 355041.791 | 50.  | L   | -41.  | -41.  |
| $5_{3,3} - 4_{3,2}$     | 355190.900 | 50.  | L   | -6.   | -8.   |
| $5_{3,2} - 4_{3,1}$     | 355202.601 | 50.  | L   | -10.  | -11.  |
| $5_{2,3} - 4_{2,2}$     | 356176.243 | 100. | L   | -52.  | -53.  |
| $5_{1,4} - 4_{1,3}$     | 366270.152 | 50.  | L   | -8.   | -9.   |
| $39_{4,35} - 39_{4,36}$ | 366822.983 | 50.  | L   | -32.  | -13.  |
| $24_{2,22} - 25_{0,25}$ | 373598.415 | 50.  | L   | -38.  | -25.  |
| $8_{2,6} - 9_{0,9}$     | 378521.577 | 50.  | L   | 47.   | 48.   |
| $6_{0,6} - 5_{0,5}$     | 423860.165 | 30.  | 6   | -1.   | -2.   |
| $6_{2,5} - 5_{2,4}$     | 425743.498 | 50.  | L   | -44.  | -45.  |
| $6_5 - 5_5$             | 425867.772 | 50.  | L   | -41.  | -42.  |
| $6_4 - 5_4$             | 426064.017 | 50.  | L   | -11.  | -12.  |
| $6_{3,4} - 5_{3,3}$     | 426290.974 | 50.  | L   | -24.  | -25.  |
| $6_{3,3} - 5_{3,2}$     | 426322.158 | 50.  | L   | -30.  | -31.  |
| $6_{2,4} - 5_{2,3}$     | 427971.827 | 50.  | L   | -2.   | -3.   |
| $17_{3,14} - 18_{1,17}$ | 433357.359 | 50.  | L   | -65.  | -65.  |
| $25_{2,23} - 26_{0,26}$ | 435102.382 | 50.  | L   | -105. | -90.  |
| $6_{1,5} - 5_{1,4}$     | 439318.781 | 50.  | L   | -26.  | -27.  |
| $31_{3,28} - 31_{3,29}$ | 469818.642 | 50.  | L   | -11.  | -3.   |
| $22_{2,20} - 22_{2,21}$ | 473118.858 | 10.  | C   | 2.    | -0.   |
| $7_{1,7} - 6_{1,6}$     | 480194.687 | 20.  | C   | -6.   | -6.   |
| $7_{0,7} - 6_{0,6}$     | 493531.105 | 10.  | C   | 8.    | 7.    |
| $7_{2,6} - 6_{2,5}$     | 496515.067 | 10.  | C   | -1.   | -2.   |
| $7_6 - 6_6$             | 496616.397 | 30.  | C   | -14.  | -15.  |
| $7_5 - 6_5$             | 496861.805 | 20.  | C   | -4.   | -6.   |
| $7_4 - 6_4$             | 497115.042 | 10.  | C   | 12.   | 11.   |
| $7_{3,5} - 6_{3,4}$     | 497419.902 | 10.  | C   | 7.    | 6.    |
| $7_{3,4} - 6_{3,3}$     | 497489.991 | 10.  | C   | -7.   | -8.   |

|                         |            |     |   |      |      |
|-------------------------|------------|-----|---|------|------|
| $7_{2,5} - 6_{2,4}$     | 500060.814 | 10. | C | -5.  | -6.  |
| $6_{2,4} - 7_{0,7}$     | 500326.943 | 15. | C | -9.  | -7.  |
| $26_{2,24} - 27_{0,27}$ | 501924.320 | 40. | C | -20. | -4.  |
| $7_{1,6} - 6_{1,5}$     | 512250.361 | 10. | C | -1.  | -2.  |
| $16_{3,13} - 17_{1,16}$ | 516187.082 | 30. | C | 27.  | 26.  |
| $26_{4,22} - 27_{2,25}$ | 525112.358 | 80. | C | 15.  | 36.  |
| $32_{3,29} - 32_{3,30}$ | 537401.975 | 20. | C | -5.  | 5.   |
| $23_{2,21} - 23_{2,22}$ | 539485.803 | 10. | C | -4.  | -7.  |
| $15_{1,14} - 15_{1,15}$ | 540004.969 | 10. | C | 3.   | 3.   |
| $8_{1,8} - 7_{1,7}$     | 548475.110 | 10. | C | -8.  | -8.  |
| $8_{0,8} - 7_{0,7}$     | 562777.574 | 10. | C | -2.  | -2.  |
| $5_{2,3} - 6_{0,6}$     | 565886.209 | 15. | C | -11. | -9.  |
| $8_{2,7} - 7_{2,6}$     | 567201.127 | 15. | C | -1.  | -1.  |
| $8_7 - 7_7$             | 567257.150 | 20. | C | 8.   | 8.   |
| $8_6 - 7_6$             | 567565.978 | 20. | C | 3.   | 2.   |
| $8_5 - 7_5$             | 567863.184 | 15. | C | 2.   | 1.   |
| $8_{4,5} - 7_{4,4}$     | 568183.974 | 50. | C | 5.   | 4.   |
| $8_{4,4} - 7_{4,3}$     | 568185.273 | 50. | C | -18. | -19. |
| $8_{3,6} - 7_{3,5}$     | 568578.375 | 10. | C | 1.   | 0.   |
| $8_{3,5} - 7_{3,4}$     | 568718.359 | 10. | C | -9.  | -10. |
| $8_{2,6} - 7_{2,5}$     | 572476.275 | 15. | C | -2.  | -3.  |
| $8_{1,7} - 7_{1,6}$     | 585041.059 | 10. | C | -1.  | -2.  |
| $15_{3,12} - 16_{1,15}$ | 602083.584 | 10. | C | 5.   | 5.   |
| $16_{1,15} - 16_{1,16}$ | 608647.425 | 10. | C | 3.   | 5.   |
| $24_{2,22} - 24_{2,23}$ | 609865.380 | 80. | C | 18.  | 15.  |
| $9_{1,9} - 8_{1,8}$     | 616638.883 | 10. | C | -0.  | -0.  |
| $9_{0,9} - 8_{0,8}$     | 631564.941 | 15. | C | -1.  | -1.  |
| $9_8 - 8_8$             | 637772.781 | 40. | C | -44. | -43. |
| $9_{2,8} - 8_{2,7}$     | 637789.770 | 15. | C | 2.   | 2.   |
| $9_7 - 8_7$             | 638157.239 | 10. | C | -1.  | -1.  |
| $9_6 - 8_6$             | 638517.255 | 30. | C | -6.  | -7.  |
| $9_5 - 8_5$             | 638872.973 | 10. | C | 1.   | -0.  |
| $9_{4,6} - 8_{4,5}$     | 639273.921 | 40. | C | 17.  | 17.  |
| $9_{4,5} - 8_{4,4}$     | 639277.036 | 40. | C | -36. | -37. |
| $9_{3,7} - 8_{3,6}$     | 639765.485 | 10. | C | -4.  | -5.  |
| $9_{3,6} - 8_{3,5}$     | 640021.607 | 10. | C | -0.  | -0.  |
| $9_{1,8} - 8_{1,7}$     | 657665.168 | 10. | C | -2.  | -2.  |
| $17_{1,16} - 17_{1,17}$ | 680289.541 | 10. | C | 2.   | 5.   |
| $25_{2,23} - 25_{2,24}$ | 683994.702 | 10. | C | -3.  | -6.  |
| $34_{3,31} - 34_{3,32}$ | 686388.132 | 20. | C | -1.  | 4.   |

---

|                                         |             |      |   |       |       |
|-----------------------------------------|-------------|------|---|-------|-------|
| 14 <sub>3,11</sub> - 15 <sub>1,14</sub> | 690301.028  | 10.  | C | -1.   | -0.   |
| 10 <sub>9</sub> - 9 <sub>9</sub>        | 708146.472  | 10.  | C | -3.   | -1.   |
| 10 <sub>8</sub> - 9 <sub>8</sub>        | 708617.723  | 10.  | C | -3.   | -2.   |
| 10 <sub>7</sub> - 9 <sub>7</sub>        | 709054.824  | 10.  | C | -3.   | -3.   |
| 10 <sub>6</sub> - 9 <sub>6</sub>        | 709470.468  | 10.  | C | -2.   | -3.   |
| 10 <sub>5</sub> - 9 <sub>5</sub>        | 709892.214  | 10.  | C | -5.   | -5.   |
| 29 <sub>2,27</sub> - 30 <sub>0,30</sub> | 728936.892  | 80.  | C | 66.   | 63.   |
| 10 <sub>1,9</sub> - 9 <sub>1,8</sub>    | 730094.750  | 15.  | C | 2.    | 3.    |
| 18 <sub>1,17</sub> - 18 <sub>1,18</sub> | 754572.861  | 10.  | C | -1.   | 3.    |
| 26 <sub>2,24</sub> - 26 <sub>2,25</sub> | 761576.979  | 10.  | C | -0.   | -4.   |
| 35 <sub>3,32</sub> - 35 <sub>3,33</sub> | 767263.223  | 10.  | C | 5.    | 4.    |
| 11 <sub>0,11</sub> - 10 <sub>0,10</sub> | 767707.807  | 10.  | C | -3.   | -2.   |
| 2 <sub>2,0</sub> - 3 <sub>0,3</sub>     | 772897.697  | 80.  | C | -10.  | -7.   |
| 11 <sub>10</sub> - 10 <sub>10</sub>     | 778361.217  | 10.  | C | -2.   | -3.   |
| 11 <sub>2,10</sub> - 10 <sub>2,9</sub>  | 778627.867  | 20.  | C | -6.   | -5.   |
| 11 <sub>9</sub> - 10 <sub>9</sub>       | 778930.116  | 10.  | C | 6.    | 7.    |
| 11 <sub>8</sub> - 10 <sub>8</sub>       | 779456.685  | 10.  | C | 5.    | 5.    |
| 11 <sub>7</sub> - 10 <sub>7</sub>       | 779949.614  | 10.  | C | 4.    | 3.    |
| 13 <sub>3,10</sub> - 14 <sub>1,13</sub> | 780155.524  | 10.  | C | 4.    | 4.    |
| 11 <sub>6</sub> - 10 <sub>6</sub>       | 780425.805  | 15.  | C | 5.    | 4.    |
| 11 <sub>5</sub> - 10 <sub>5</sub>       | 780921.969  | 10.  | C | 9.    | 9.    |
| 11 <sub>4,8</sub> - 10 <sub>4,7</sub>   | 781524.879  | 15.  | C | 32.   | 33.   |
| 11 <sub>4,7</sub> - 10 <sub>4,6</sub>   | 781538.528  | 15.  | C | -13.  | -12.  |
| 11 <sub>3,9</sub> - 10 <sub>3,8</sub>   | 782212.463  | 10.  | C | 1.    | 3.    |
| 11 <sub>3,8</sub> - 10 <sub>3,7</sub>   | 782921.228  | 10.  | C | 0.    | 1.    |
| 34 <sub>5,29</sub> - 35 <sub>3,32</sub> | 790327.647  | 80.  | C | 18.   | 1.    |
| 11 <sub>2,9</sub> - 10 <sub>2,8</sub>   | 791801.333  | 10.  | C | 2.    | 4.    |
| 11 <sub>1,10</sub> - 10 <sub>1,9</sub>  | 802299.452  | 10.  | C | -1.   | -0.   |
| 30 <sub>2,28</sub> - 31 <sub>0,31</sub> | 811571.357  | 80.  | C | 115.  | 93.   |
| 12 <sub>1,12</sub> - 11 <sub>1,11</sub> | 820358.746  | 20.  | C | -10.  | -8.   |
| 19 <sub>1,18</sub> - 19 <sub>1,19</sub> | 831103.267  | 30.  | C | -10.  | -4.   |
| 12 <sub>0,12</sub> - 11 <sub>0,11</sub> | 835085.166  | 10.  | C | 2.    | 4.    |
| 15 <sub>0,15</sub> - 14 <sub>0,14</sub> | 1034953.744 | 300. | L | -7.   | -2.   |
| 12 <sub>2,11</sub> - 12 <sub>0,12</sub> | 1036107.763 | 300. | L | -72.  | -70.  |
| 13 <sub>2,12</sub> - 13 <sub>0,13</sub> | 1052998.896 | 300. | L | -311. | -308. |
| 15 <sub>2,14</sub> - 14 <sub>2,13</sub> | 1058636.087 | 300. | L | -248. | -242. |
| 17 <sub>2,16</sub> - 16 <sub>2,15</sub> | 1197646.855 | 300. | L | -33.  | -23.  |
| 17 <sub>13</sub> - 16 <sub>13</sub>     | 1199255.134 | 300. | L | 251.  | 211.  |
| 17 <sub>12</sub> - 16 <sub>12</sub>     | 1200393.699 | 400. | L | -101. | -102. |
| 17 <sub>11</sub> - 16 <sub>11</sub>     | 1201461.847 | 300. | L | -106. | -103. |

|                         |             |       |   |        |        |
|-------------------------|-------------|-------|---|--------|--------|
| $17_{10} - 16_{10}$     | 1202465.611 | 300.  | L | -346.  | -351.  |
| $17_9 - 16_9$           | 1203416.223 | 300.  | L | -206.  | -217.  |
| $17_8 - 16_8$           | 1204330.518 | 500.  | L | -748.  | -760.  |
| $17_7 - 16_7$           | 1205242.139 | 300.  | L | -461.  | -468.  |
| $18_{12} - 17_{12}$     | 1270884.600 | 400.  | L | 162.   | 185.   |
| $18_{11} - 17_{11}$     | 1272023.550 | 300.  | L | -405.  | -393.  |
| $18_{10} - 17_{10}$     | 1273098.782 | 500.  | L | 342.   | 338.   |
| $18_9 - 17_9$           | 1274120.989 | 500.  | L | 489.   | 476.   |
| $18_8 - 17_8$           | 1275111.425 | 300.  | L | 37.    | 23.    |
| $18_{5,14} - 17_{5,13}$ | 1278505.433 | 300.  | L | -432.  | -425.  |
| $18_{5,13} - 17_{5,12}$ | 1278518.175 | 300.  | L | -388.  | -381.  |
| $18_{4,15} - 17_{4,14}$ | 1280280.243 | 300.  | L | 89.    | 101.   |
| $18_{3,16} - 17_{3,15}$ | 1280648.639 | 300.  | L | -322.  | -309.  |
| $18_{4,14} - 17_{4,13}$ | 1280732.549 | 300.  | L | -323.  | -311.  |
| $23_8 - 22_8$           | 1628835.001 | 1000. | L | -590.  | -628.  |
| $23_7 - 22_7$           | 1630356.600 | 1000. | L | -491.  | -520.  |
| $23_{6,18} - 22_{6,17}$ | 1632122.238 | 1000. | L | -1089. | -1098. |
| $23_{6,17} - 22_{6,16}$ | 1632126.024 | 1000. | L | -582.  | -593.  |
| $23_{5,19} - 22_{5,18}$ | 1634430.689 | 1000. | L | 352.   | 359.   |
| $23_{5,18} - 22_{5,17}$ | 1634546.367 | 1000. | L | -1065. | -1059. |
| $23_{4,20} - 22_{4,19}$ | 1637183.075 | 1000. | L | -1482. | -1465. |
| $23_{1,22} - 22_{1,21}$ | 1638614.474 | 1000. | L | -725.  | -705.  |
| $23_{4,19} - 22_{4,18}$ | 1639631.981 | 1000. | L | -1129. | -1111. |
| $26_{1,25} - 25_{1,24}$ | 1836873.370 | 100.  | C | 55.    | 76.    |
| $26_{6,21} - 25_{6,20}$ | 1845136.078 | 250.  | C | 103.   | 71.    |
| $26_{6,20} - 25_{6,19}$ | 1845148.752 | 250.  | C | 2.     | -30.   |
| $26_{3,24} - 25_{3,23}$ | 1845226.649 | 100.  | C | 92.    | 141.   |
| $26_{4,22} - 25_{4,21}$ | 1856779.863 | 150.  | C | 62.    | 72.    |
| $27_{2,26} - 26_{2,25}$ | 1880901.994 | 70.   | C | -78.   | -60.   |

<sup>a</sup>Since  $K_a + K_c = J$  or  $J + 1$ ,  $K_c$  has been omitted for prolate paired transitions.

<sup>b</sup>K, L, C refers to lines measured in Kiel, Lille, and Cologne, respectively; the remaining lines are from Ref. 14 or have been summarized in Ref. 6.

---
